# Supplementary material
Source: publisher site journal article supplement (https://www.dovepress.com/get_supplementary_file.php?f=216222.docx)
Supplement: Supplementary file 1 [file get_supplementary_file.php]

**SUPPLEMENT**

**SUPPLEMENTAL TABLE 1. Needle Length and Injection Spacing**

|  | **Initial Treatment** | **Touch-up Treatment** | **Repeat Treatment** |
| --- | --- | --- | --- |
| **Needle length, n (%)** |  |  |  |
| Cheeka | n=261 | n=46 | n=124 |
| 1/2 inch | 124 (47.5) | 26 (56.5) | 76 (61.3) |
| 3/16 inch | 137 (52.5) | 20 (43.5) | 48 (38.7) |
| Forehead | n=120 | n=0 | n=54 |
| 1/2 inch | 56 (46.7) | 0 | 35 (64.8) |
| 3/16 inch | 64 (53.3) | 0 | 19 (35.2) |
| Neck | n=96 | n=0 | n=30 |
| 1/2 inch | 47 (49.0) | 0 | 24 (80.0) |
| 3/16 inch | 49 (51.0) | 0 | 6 (20.0) |
| **Spacing of injections, n (%)** |  |  |  |
| Cheek | n=261a | n=46a | n=124a |
| <1 cm apartb | 184 (70.5) | 44 (95.7) | 92 (74.2) |
| 1 cm apartb | 77 (29.5) | 2 (4.3) | 32 (25.8) |
| >1 cm apartb | 0 | 0 | 0 |
| Forehead | n=120 | n=0 | n=54 |
| <1 cm apart | 63 (52.5) | 0 | 30 (55.6) |
| 1 cm apart | 50 (41.7) | 0 | 24 (44.4) |
| >1 cm apart | 7 (5.8) | 0 | 0 |
| Neck | n=96 | n=0 | n=30 |
| <1 cm apart | 51 (53.1) | 0 | 17 (56.7) |
| 1 cm apart | 42 (43.8) | 0 | 13 (43.3) |
| >1 cm apart | 3 (3.1) | 0 | 0 |

aNumber of treated cheeks.

bSpacing per individual cheek.

**SUPPLEMENTAL TABLE 2. Instrument Measures of Cheek Skin Smoothness and Skin Deformation**

|  |  | **Mean Change From Baseline** | | | | | | | | |
| --- | --- | --- | --- | --- | --- | --- | --- | --- | --- | --- |
|  | **Baseline** | **Month 1** | | **Month 4** | | **Month 6** | | **Month 9** | | **Month 1R** |
| **Smoothness parameters measured by fringe projection system** | | | | | | | | | | |
|  | n=130 | n=130 | n=121 | | n=127 | | n=128 | | n=62 | |
| Average roughness, μm | 35.51 | −0.83 | 0.58 | | 0.59 | | 0.78 | | 0.93 | |
| Average relief, μm | 138.65 | −4.69a | 2.04 | | 1.33 | | 1.92 | | 3.85 | |
| Amplitude, μm | 259.53 | −5.81 | 3.29 | | 4.51 | | 4.06 | | 11.53 | |
| **Skin deformation parameters measured by Cutometer Multi Probe Adapter 580** | | | | | | | | | | |
| Absolute parameters, mm | n=130 | n=130 | n=127 | | n=126 | | n=128 | | n=62 | |
| Immediate deformation (Ue), mmc | 0.204 | −0.019b | −0.022b | | −0.002 | | 0.016a | | 0.051b | |
| Delayed deformation (Uv), mmd | 0.070 | −0.008b | −0.008b | | −0.001 | | 0.009a | | 0.017b | |
| Total deformation (UF), mme | 0.273 | −0.027b | −0.030b | | −0.003 | | 0.025a | | 0.068b | |
| Immediate recovery (Ur), mmf | 0.120 | −0.011b | −0.014b | | −0.004 | | −0.017b | | −0.003 | |
| Total recovery (Ua), mmg | 0.198 | −0.021b | −0.028b | | −0.010 | | −0.014a | | 0.019a | |
| Residual deformation (R), mmh | 0.075 | −0.006a | −0.002 | | 0.007 | | 0.039b | | 0.049b | |
| Relative parametersi |  |  |  | |  | |  | |  | |
| Gross elasticity (R2) | 0.732 | −0.007 | −0.025a | | −0.027a | | −0.123b | | −0.001b | |
| Net elasticity (R5) | 0.614 | 0.004 | −0.004 | | −0.003 | | −0.144b | | −0.152b | |
| Visco-elasticity (R6) | 0.366 | −0.003 | 0.004 | | 0.010 | | 0.008 | | 0.1361 | |
| Raw elasticity (R7) | 0.449 | 0.003 | −0.006 | | −0.008 | | −0.111b | | −0.110b | |

a*p* < .05; paired *t*-test for mean change from baseline.

b*p* < .001; paired *t*-test for mean change from baseline.

cIncrease indicates greater extent of skin deformation, improved suppleness.

dDecrease indicates increased plasticity; increase may indicate greater fluid content in the skin.

eDecrease indicates inability to deform skin to same extent, or tensing effect of firmer skin. Decrease may also indicate increased skin thickness.

fDirectly correlated with UF and Ue; decrease indicates more toned skin.

gIncrease indicates greater capacity for skin to recover, more pliable skin.

hDecrease indicates improvement in elasticity; skin returns to original state faster.

iIncreases characterize improvement of intrinsic structure to that of younger skin.
